# Supplementary material for: Characterization of the Testis-Specific Angiotensin Converting Enzyme (tACE)-Interactome during Bovine Sperm Capacitation
Source: MDPI journal article supplement (doi:10.3390/cimb44010031), 2022-01-17
Supplement: s1 [file s1]

# **Supplementary materials: Characterization of the testis-specific Angiotensin Converting Enzyme (tACE)-interactome during bovine sperm capacitation**

Mina Ojaghi, Jacob Varghese, John P. Kastelic, and Jacob C. Thundathil\*

## **Description on tACE immunolocalization**

The purpose of Figure 3 was to demonstrate the difference in tACE and beta-tubulin distribution before and after capacitation within the sperm head. We previously reported immunolocalization of tACE within the sperm head and sperm tail [13]. Figure S1 demonstrates co-localization of beta-tubulin and tACE within the sperm tail during the current study (this was not clear in Figure 3), captured using a spectral confocal microscope (Leica TCS SP8) using a 63x objective lens immersed in oil.

The secondary antibody controls (incubation without anti-tACE, anti- $\beta$ -tubulin, and anti-ATP1A4) with associated phase contrast images are included in Figure S2. A lower magnification (20x) was used to demonstrate that background fluorescence due to non-specific binding was negligible in a larger field of view.

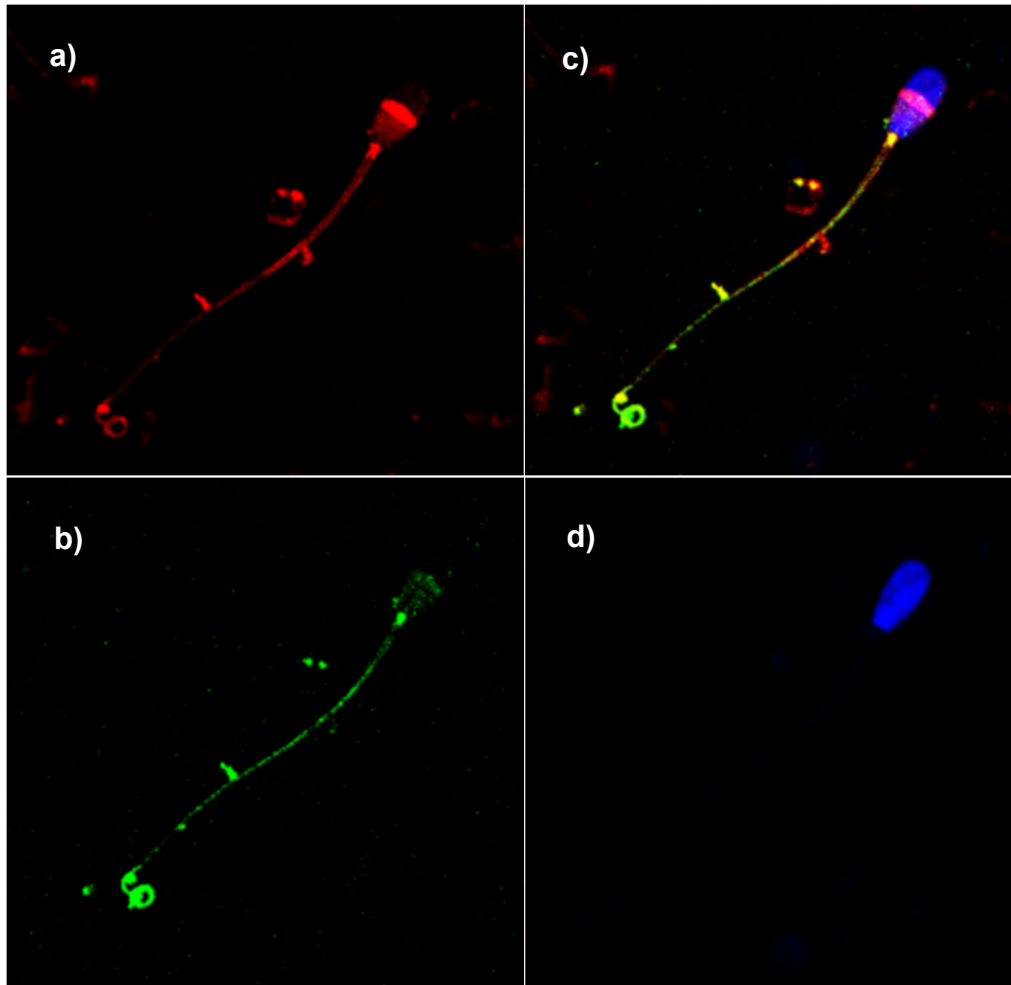

**Figure S1:** Immunofluorescent localization of anti-tACE (**a**) and anti- $\beta$ -tubulin (**b**), with overlaid merge of channels (**c**) and DAPI nuclear stain (**d**) in 4 h heparin-capacitated bovine sperm. Images were captured using a spectral confocal microscope (Leica TCS SP8) using a 63x objective lens immersed in oil.

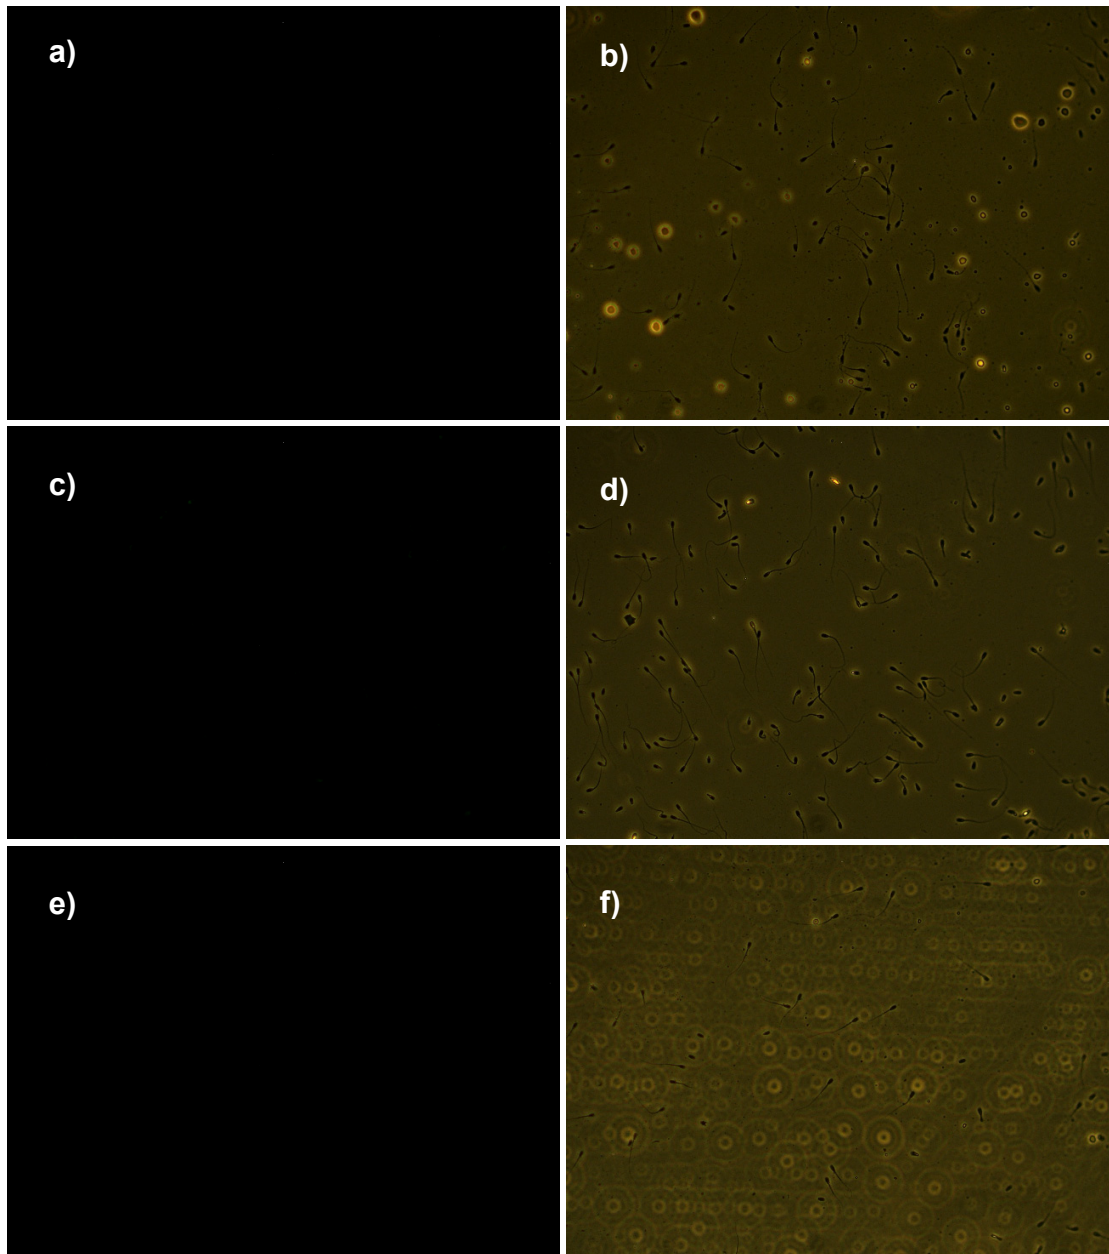

**Figure S2:** Secondary antibody control and associated phase contrast field of tACE (a,b),  $\beta$ -tubulin (c,d), and ATP1A4 (e,f) in bovine sperm. Images were captured using an inverted phase contrast fluorescence microscope (Zeiss Axio Observer Z1) equipped with Axiocam MRc5 using a 20x objective lens.

### Original unedited blots

In the supplemental section, we provided the original raw blots indicating the proteins probed after immunoprecipitation with tACE.

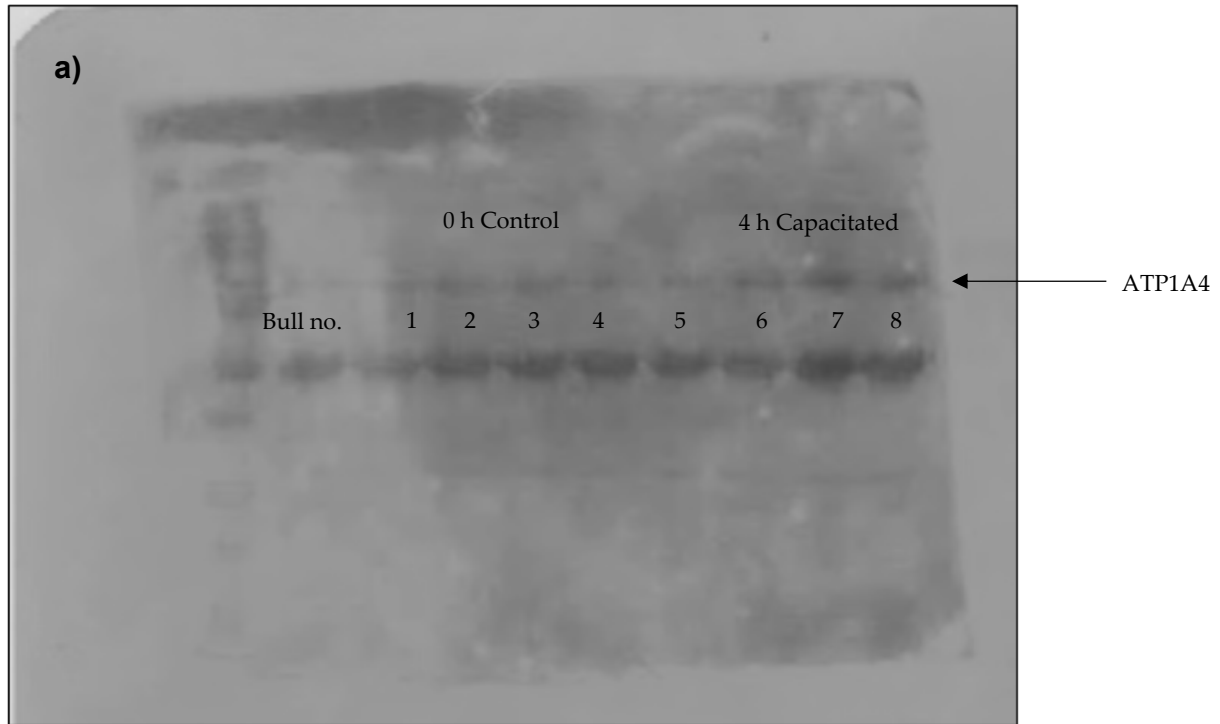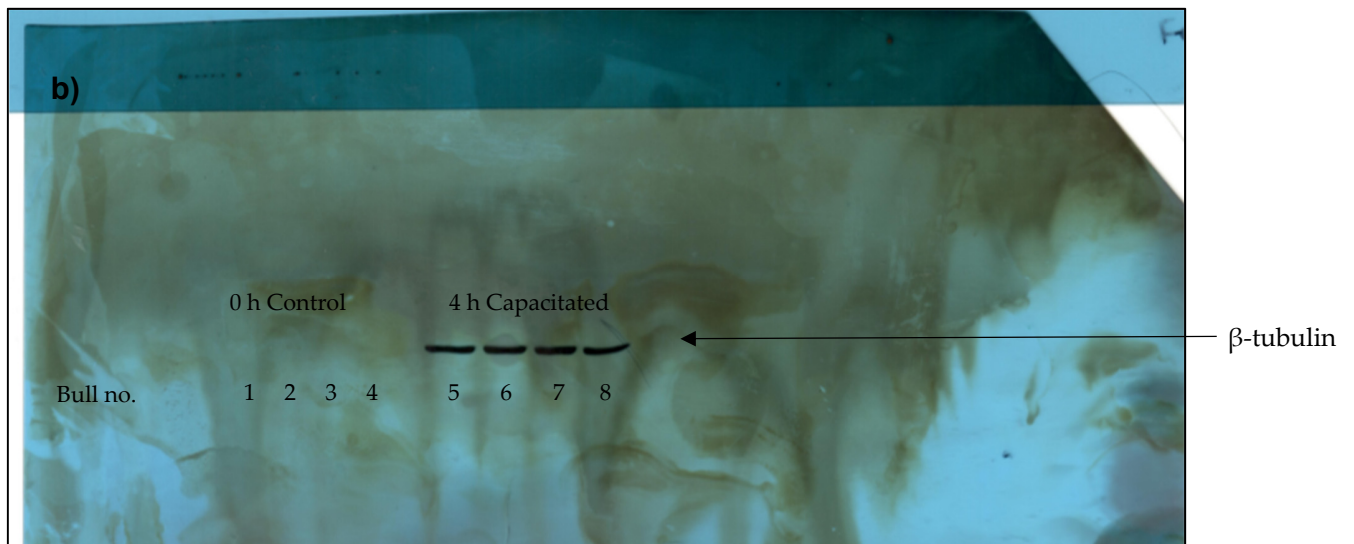

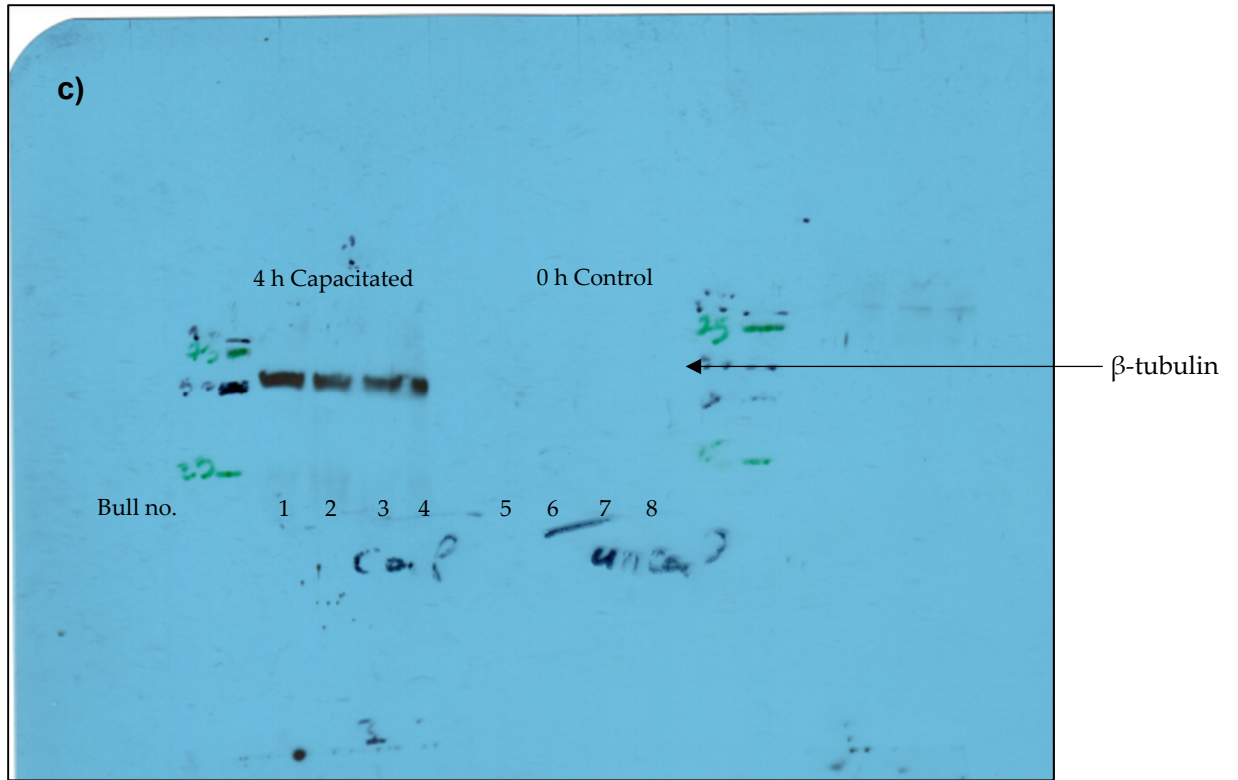

**Figure S3:** Original unedited blots used in Figure 5 of the manuscript for (a) ATP1A4 and (b)  $\beta$ -tubulin. An additional blot (c) for  $\beta$ -tubulin immunoprecipitated using anti-tACE antibody exclusively after capacitation is also shown.
